# Supplementary material for: Solochrome Dark Blue Azo Dye Removal by Sonophotocatalysis Using Mn2+ Doped ZnS Quantum Dots
Source: MDPI journal article supplement (doi:10.3390/catal11091025), 2021-08-24
Supplement: s1 [file s1]

# Supplementary Materials: Solochrome Dark Blue Azo Dye Removal by Sonophotocatalysis Using Mn<sup>2+</sup>doped ZnS Quantum Dots

Jyoti Patel <sup>1</sup>, Ajaya K. Singh <sup>1,\*</sup>, Bhawana Jain <sup>1</sup>, Sushma Yadav <sup>1</sup>, S  nia A. C. Carabineiro <sup>2</sup> and Md. Abu Bin Hasan Susan <sup>3</sup>

**Table S1.** Kinetic parameters: rate constants (*k*), correlation coefficients (*R*<sup>2</sup>) and decolorization efficiency (DE) for the removal of Solochrome dark blue dye by Mn<sup>2+</sup>:ZnS Qds.

| Conditions                                           | <i>q<sub>e</sub></i> | Rate Constant ( <i>k</i> ,<br>g mg <sup>-1</sup> min <sup>-1</sup> ) | <i>R</i> <sup>2</sup> | DE (%) |
|------------------------------------------------------|----------------------|----------------------------------------------------------------------|-----------------------|--------|
| Pure ZnS Qds + UV light                              | 12.82                | 1.4 ×10 <sup>-2</sup>                                                | 0.98                  | 46.6   |
| Mn <sup>2+</sup> :ZnS Qds + UV light                 | 15.15                | 1.26 ×10 <sup>-2</sup>                                               | 0.98                  | 55.22  |
| Pure ZnS Qds +<br>Ultrasound                         | 17.85                | 5.2 ×10 <sup>-3</sup>                                                | 0.94                  | 62.37  |
| Mn <sup>2+</sup> :ZnS Qds +<br>Ultrasound            | 19.60                | 5.9 ×10 <sup>-3</sup>                                                | 0.96                  | 69.7   |
| Pure ZnS Qds + UV light<br>+ Ultrasound              | 21.27                | 5.0 ×10 <sup>-3</sup>                                                | 0.95                  | 76.06  |
| Mn <sup>2+</sup> :ZnS Qds + UV light<br>+ Ultrasound | 25                   | 3.97 ×10 <sup>-3</sup>                                               | 0.95                  | 89     |

**Table S2.** Data for Solochrome dark blue dye.

| Structure                                                                           | Molecular weight | λ <sub>max</sub> | Molecular formula                                                |
|-------------------------------------------------------------------------------------|------------------|------------------|------------------------------------------------------------------|
| 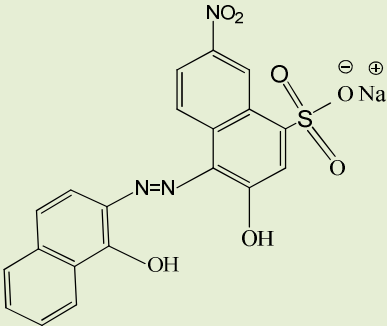 | 461.381 g/mol    | 560 nm           | C <sub>20</sub> H <sub>12</sub> N <sub>3</sub> O <sub>7</sub> Na |

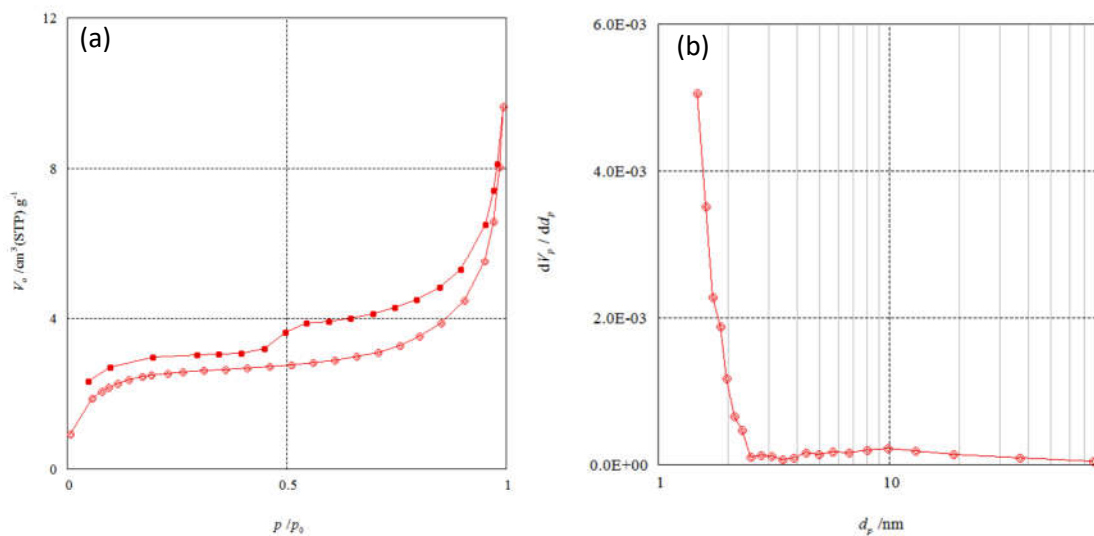

**Figure S1.** (a)  $N_2$  adsorption-desorption isotherms of  $Mn^{2+}:ZnS$  Qds. (b) Pore size distribution obtained by BJH-adsorption.

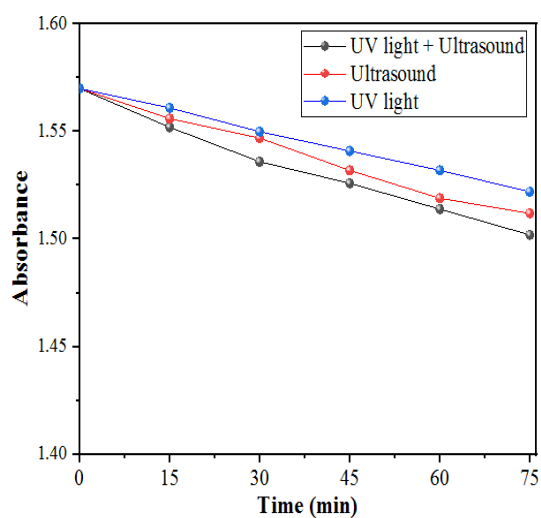

**Figure S2.** SDB absorbance changes at absorption maximum ( $\lambda_{max} = 560$  nm) for the ultrasound and UV light assisted degradation in the absence of pure and doped  $Mn^{2+}:ZnS$  Qds at optimum conditions (15 mL of 70 ppm SDB, pH 6, 75 min ultrasound and/or UV light irradiation).

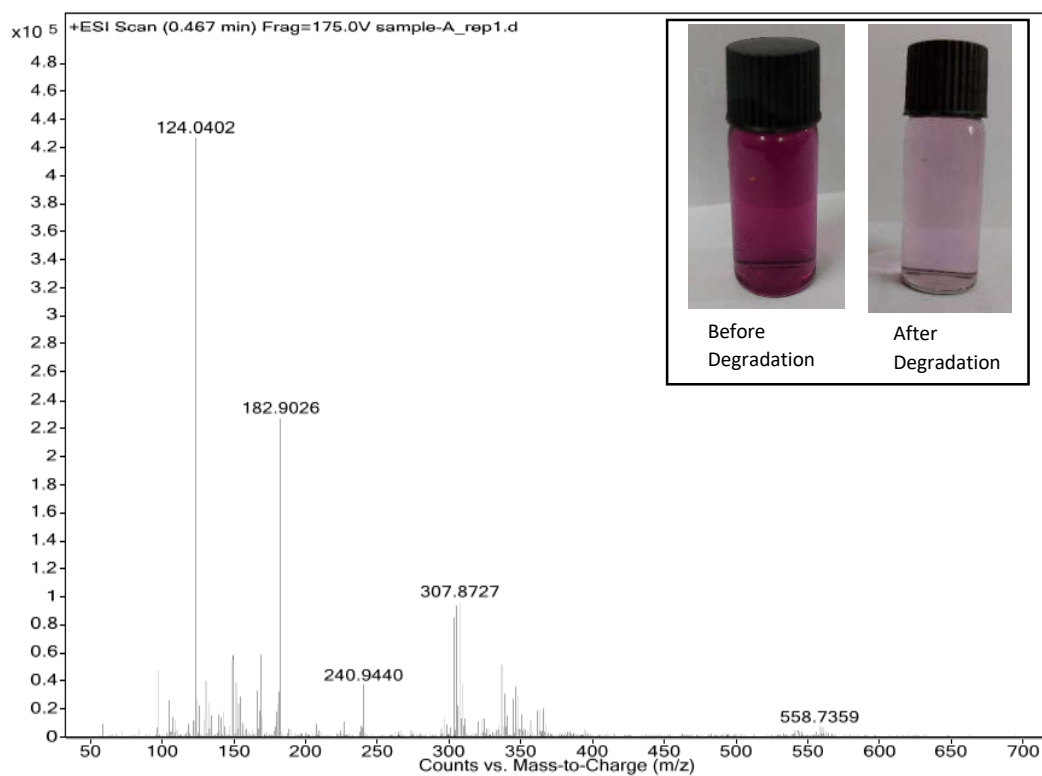

**Figure S3.** LC–MS of  $\text{Mn}^{2+}$  doped ZnS assisted photodegraded SDB solution. Inset: SDB solution before and after degradation (after 75 mins).

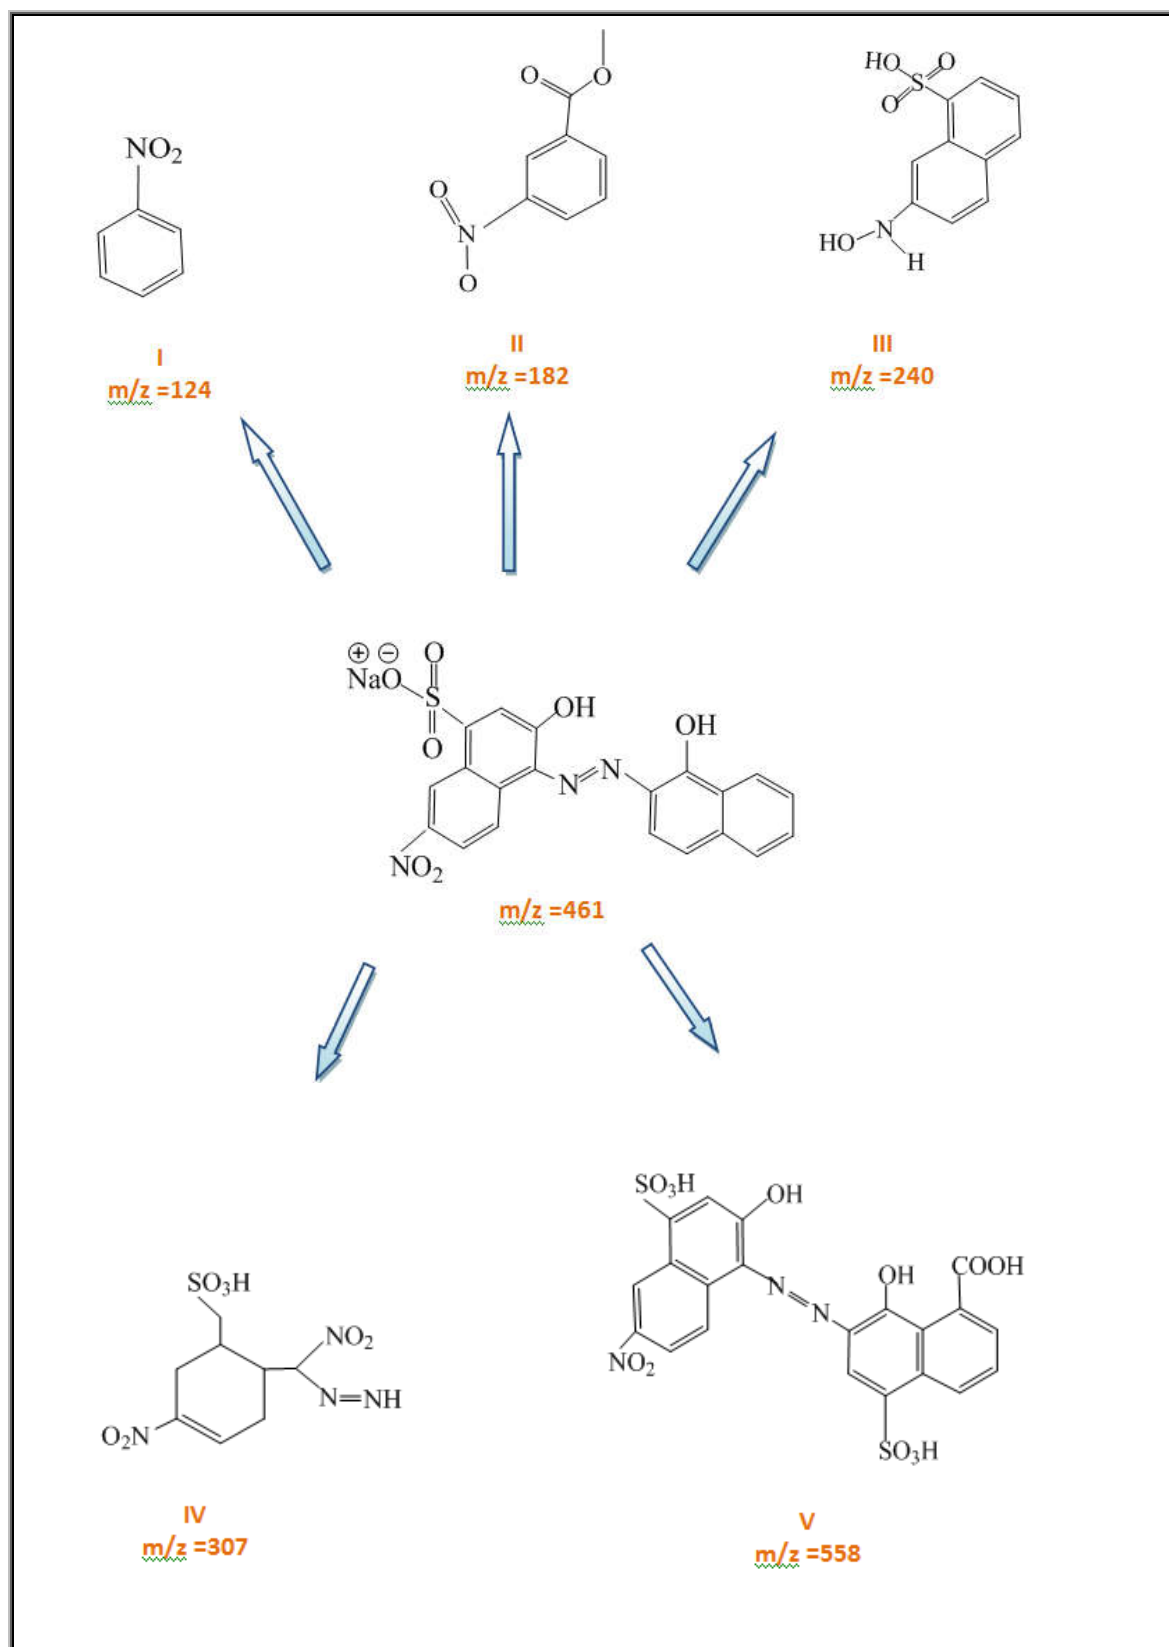

**Figure S4.** Degradation products of SDB photodegradation catalyzed by  $\text{Mn}^{2+}$ :ZnS Qds.

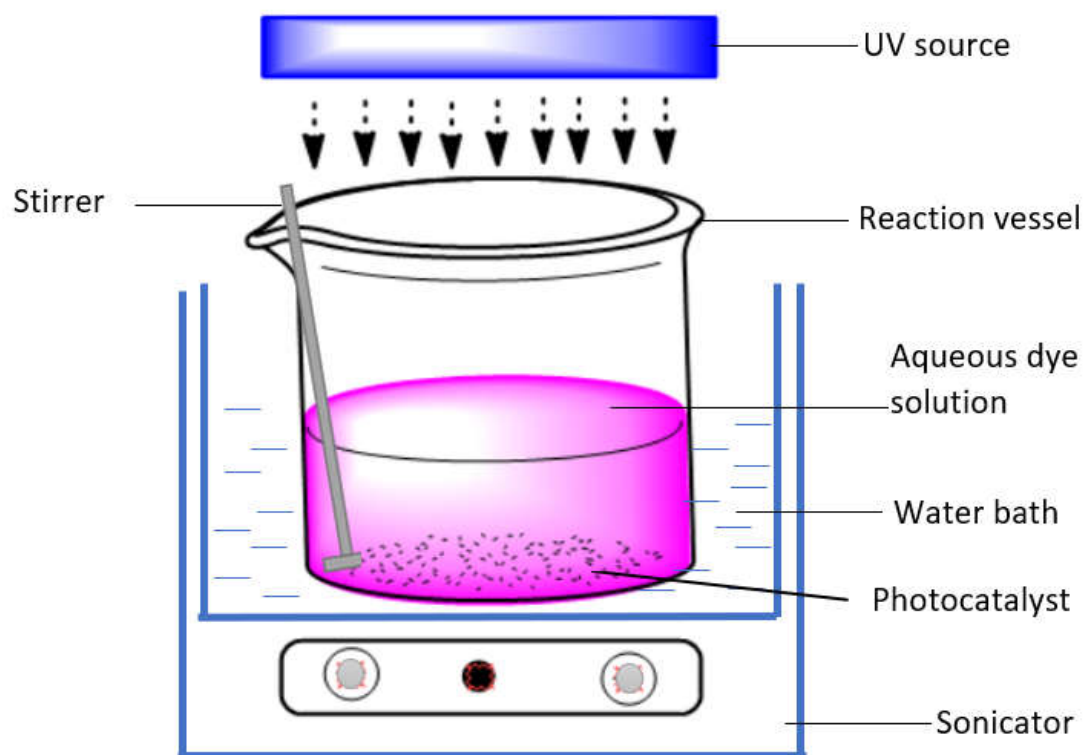

**Figure S5.** Schematic diagram of sonophotocatalytic experimental setup
